# Supplementary material for: A biphasic response to blueberry supplementation on depressive symptoms in emerging adults: a double-blind randomized controlled trial
Source: PubMed Central journal article supplement (PMC11139700; doi:10.1007/s00394-023-03311-9), 2024-02-01
Supplement: 394_2023_3311_MOESM1_ESM.pdf [file 394_2023_3311_MOESM1_ESM.pdf]

### Analytical characterization of freeze-dried blueberry powder

Characterization of freeze-dried blueberry powder obtained from Wild Blueberry Association of North America (WBANA) was carried out by Dr. Mario Ferruzzi, Professor in the Department of Food, Bioprocessing and Nutrition Sciences at the Plants for Human Health Institute, North Carolina State University. The composition of anthocyanins and other major constituents are listed in Table 1 and 2.

Table 1. Anthocyanins in freeze-dried blueberry powder as quantified by LC-MS method

| <i>Anthocyanins in Freeze-dried Wild Blueberry Powder (mg/100 g powder)</i> |              |              |              |              |               |
|-----------------------------------------------------------------------------|--------------|--------------|--------------|--------------|---------------|
|                                                                             | Cyanidin     | Peonidin     | Petunidin    | Malvidin     | Delphinidin   |
| Galactoside                                                                 | 20.08 ± 3.25 | 14.67 ± 0.84 | 20.35 ± 0.58 | 14.33 ± 0.27 | 127.01 ± 1.36 |
| Glucoside                                                                   | 27.09 ± 1.57 | 10.66 ± 0.50 | 18.16 ± 0.37 | 20.55 ± 0.28 | 56.61 ± 2.08  |
| Arabinoside                                                                 | 26.01 ± 2.45 | 11.56 ± 0.15 | 14.33 ± 0.27 | 16.72 ± 0.29 | 33.73 ± 0.70  |
| Other                                                                       | 11.63 ± 0.08 | 9.46 ± 1.07  | 7.52 ± 0.04  | 9.59 ± 0.07  | 80.74 ± 1.26  |
| <b>Total</b>                                                                | <b>84.81</b> | <b>46.35</b> | <b>60.36</b> | <b>61.19</b> | <b>298.09</b> |

Table 2. Other major constituents in freeze-dried blueberry as quantified by LC-MS method

| <i>Other constituents in Freeze-dried Wild Blueberry Powder (mg/100 g powder)</i> |              |             |             |                       |                        |
|-----------------------------------------------------------------------------------|--------------|-------------|-------------|-----------------------|------------------------|
| Chlorogenic Acid                                                                  | Ferulic Acid | Epicatechin | Myricetin   | Quercetin-3-Glucoside | Syringetin-3-Glucoside |
| 248 ± 2.70                                                                        | 4.71 ± 0.11  | 2.87 ± 0.35 | 0.68 ± 0.04 | 31.19 ± 0.59          | 6.88 ± 0.34            |

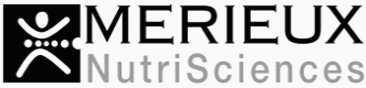

CERTIFICATE OF ANALYSIS

SILLIKER, Inc.
Illinois Laboratory

3600 Eagle Nest Drive, North Building, Crete, IL 60417
Tel. 877-777-6375 Fax. 312-729-1320

Table with COA No: CHG-41895675-0, Supersedes: None, COA Date: 12/18/18, Page 1 of 1

TO:

Mr. Anandh Babu Pon Velayutham
Assistant Professor, Nutrition & Integra
University of Utah
250 South 1850 East #224C
Salt Lake City, UT 84117

Table with Received From: Salt Lake City, UT, Received Date: 12/7/18

Table with Location of Test: (except where noted) Crete, IL

Analytical Results

Desc. 1: FD-BB Laboratory ID: 383435165
Desc. 2: Freeze dired blueberry powder Condition Rec'd: NORMAL
Temp Rec'd (°C): 20

Main analytical results table with columns: Analyte, Result, Units, Method Reference, Test Date, Loc. Includes rows for Ash, Carbohydrates, Protein, Sugars, etc.

Handwritten signature of Jeff Wilson, Division Vice President

Results reported herein are provided "as is" and are based solely upon samples as provided by client. This report may not be distributed or reproduced except in full. Client shall not at any time misrepresent the content of this report.

Except as otherwise stated, Mérieux NutriSciences Terms and Conditions for Testing Services apply.
